# Supplementary material for: EMF1 and PRC2 Cooperate to Repress Key Regulators of Arabidopsis Development
Source: PubMed Central journal article supplement (PMC3310727; doi:10.1371/journal.pgen.1002512), 2012-03-22

Figure S1

A

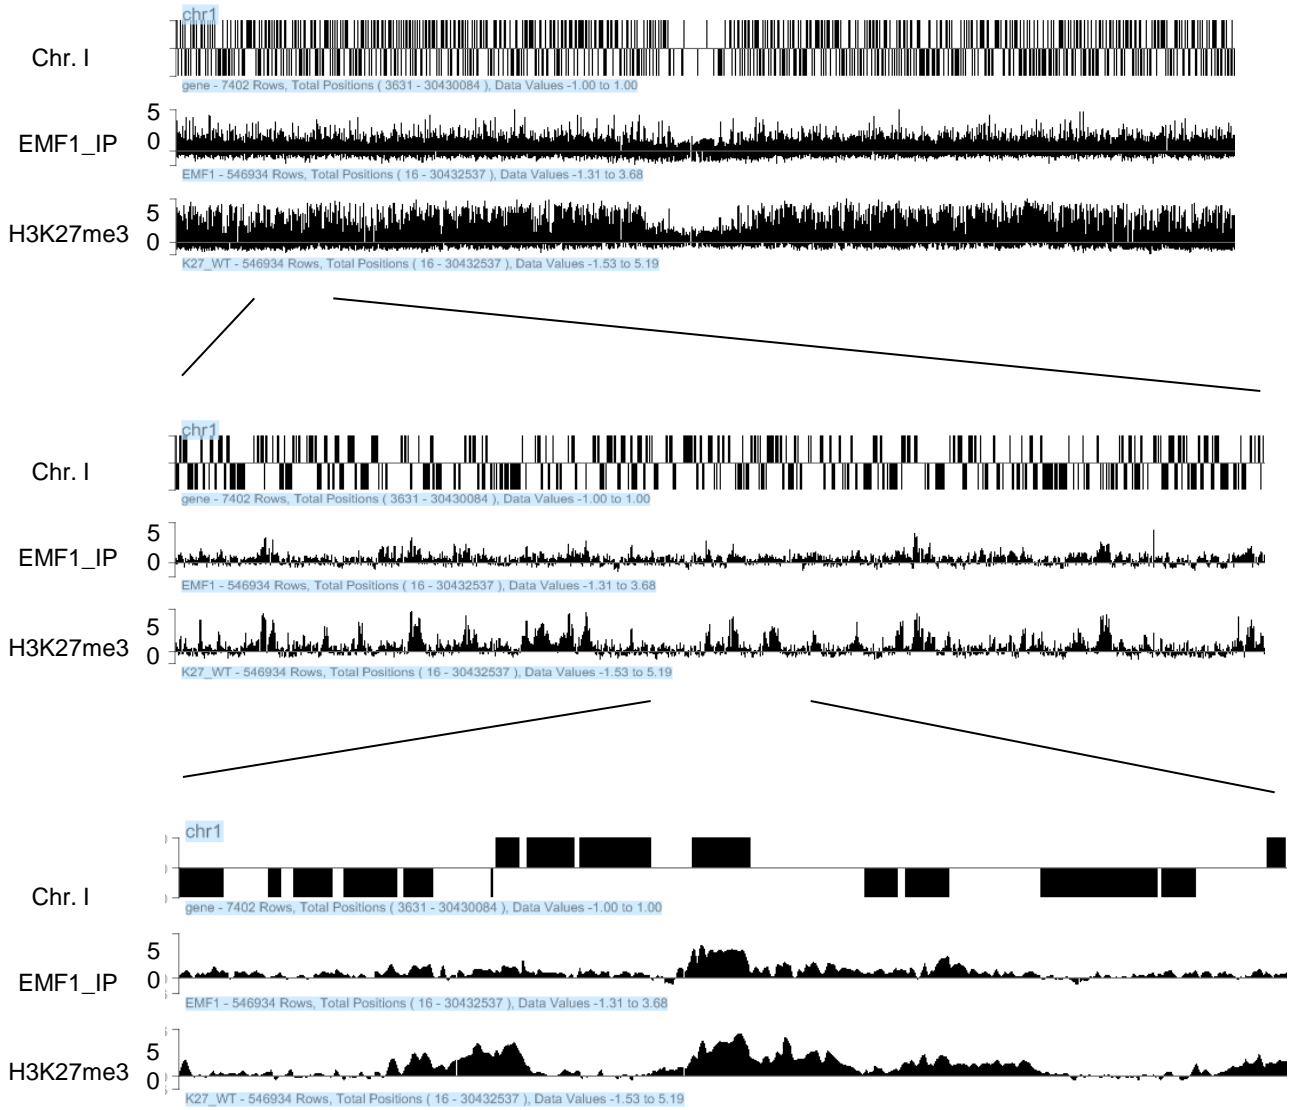

**B**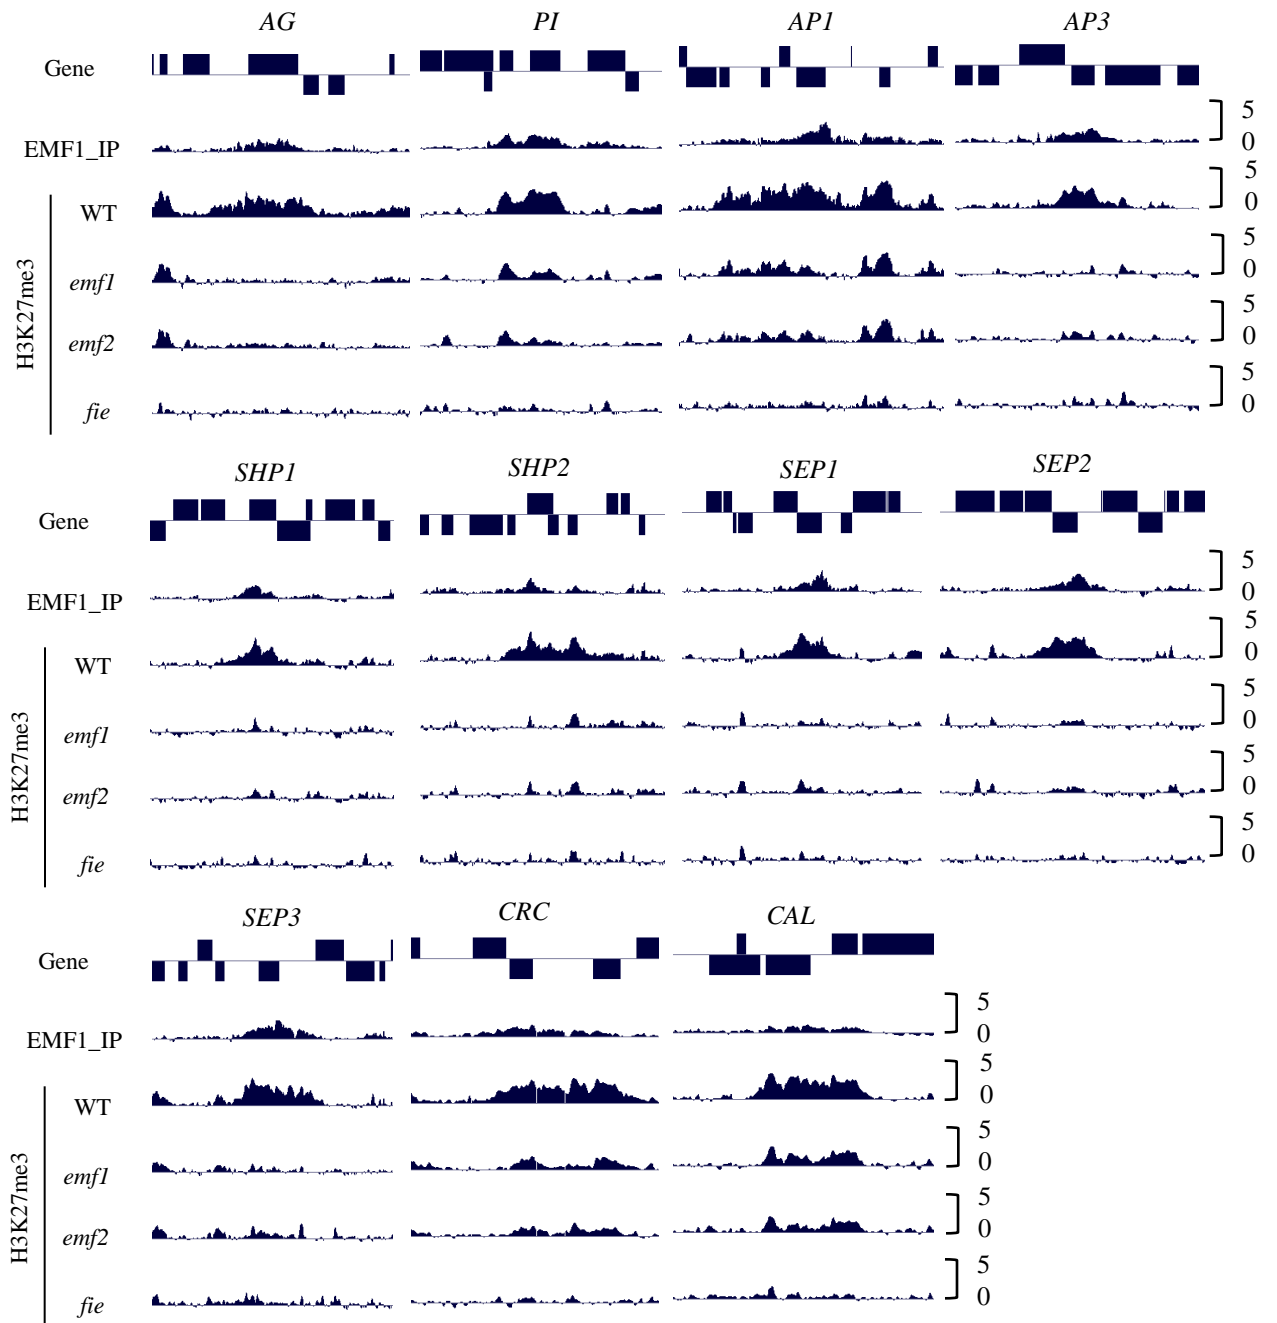

Supplement: pgen.1002512.s001.pdf [file pgen.1002512.s001.pdf]
