# Supplementary material for: EMF1 and PRC2 Cooperate to Repress Key Regulators of Arabidopsis Development
Source: PubMed Central journal article supplement (PMC3310727; doi:10.1371/journal.pgen.1002512), 2012-03-22

Figure S2

| Gene ID   | Gene Symbol                           | EMF1_IP (p-value)         | Data source                               | Gene ID   | Gene Symbol | EMF1_IP (p-value) | Data source                            |
|-----------|---------------------------------------|---------------------------|-------------------------------------------|-----------|-------------|-------------------|----------------------------------------|
| AT1g65330 | PHE1                                  | $10^{-6} < p$             | Supplemental Figure S2 & Kim et al., 2010 | AT4g18390 | TCP2        | $p < 10^{-20}$    | Supplemental Figure S2                 |
| AT3g23050 | IAA7                                  | $10^{-10} < p < 10^{-6}$  | Supplemental Figure S2                    | At1g62500 | LTP         | $p < 10^{-20}$    | Supplemental Figure S2                 |
| AT5g07200 | GA20OX3                               | $10^{-10} < p < 10^{-6}$  | Supplemental Figure S2                    | At4g18960 | AG          | $p < 10^{-20}$    | Calonje et al., 2008                   |
| At1g80130 | TPR-like                              | $10^{-15} < p < 10^{-10}$ | Supplemental Figure S2                    | At3g54340 | AP3         | $p < 10^{-20}$    | Calonje et al., 2008                   |
| At4g08940 | Ubiquitin carboxyl terminal hydrolase | $10^{-18} < p < 10^{-15}$ | Supplemental Figure S2                    | At5g20240 | PI          | $p < 10^{-20}$    | Caonje et al., 2008 & Kim et al., 2010 |
| AT4G27140 | SESA1                                 | $10^{-10} < p < 10^{-6}$  | Supplemental Figure S2                    | At3g24650 | ABI3        | $p < 10^{-20}$    | Kim et al., 2010                       |
| At2g40000 | HSPRO2                                | $p < 10^{-20}$            | Supplemental Figure S2                    | At2g02450 | LOV1        | $p < 10^{-20}$    | Kim et al., 2010                       |
| AT1g23380 | KNAT6                                 | $p < 10^{-20}$            | Supplemental Figure S2                    | At5g10140 | FLC         | $p < 10^{-20}$    | Kim et al., 2010                       |

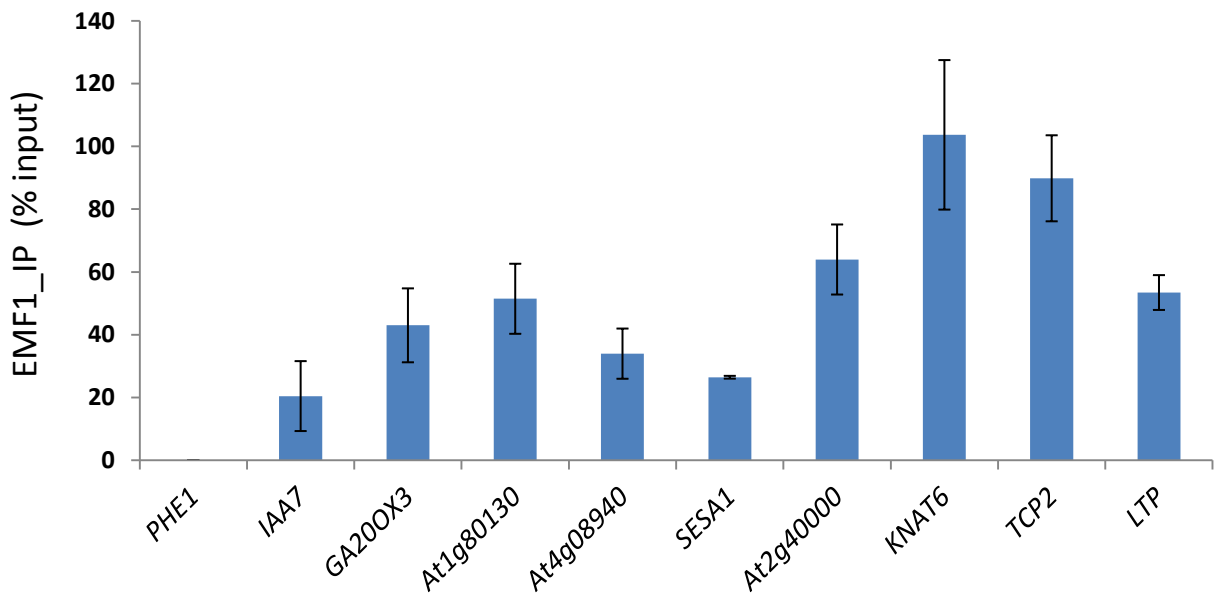

Supplement: pgen.1002512.s002.pdf [file pgen.1002512.s002.pdf]
